# Supplementary material
Source: PubMed Central journal article supplement (PMC4136512)
Supplement: NIHMS502990-supplement-06.pdf [file NIHMS502990-supplement-06.pdf]

| <b>Human Phylogenetic Branch</b> |          |        |        |        |
|----------------------------------|----------|--------|--------|--------|
|                                  | 5' Flank | 5' UTR | Coding | 3' UTR |
| <b><i>SLC6A8</i></b>             | 0.9125   | NA     | 1.0000 | NA     |
| <b><i>CKMT1B</i></b>             | 1.0000   | 1.0000 | 1.0000 | NA     |
| <b><i>CKB</i></b>                | 0.7992   | NA     | 1.0000 | 1.0000 |
| <b><i>CKMT2</i></b>              | 0.6920   | 0.9994 | 1.0000 | 0.9678 |
| <b><i>CKM</i></b>                | 1.0000   | 1.0000 | 1.0000 | 1.0000 |

  

| <b>Chimpanzee Phylogenetic Branch</b> |          |        |        |        |
|---------------------------------------|----------|--------|--------|--------|
|                                       | 5' Flank | 5' UTR | Coding | 3' UTR |
| <b><i>SLC6A8</i></b>                  | 0.3853   | NA     | 1.0000 | NA     |
| <b><i>CKMT1B</i></b>                  | 1.0000   | 1.0000 | 1.0000 | NA     |
| <b><i>CKB</i></b>                     | 0.9984   | NA     | 1.0000 | 0.9989 |
| <b><i>CKMT2</i></b>                   | 1.0000   | 1.0000 | 1.0000 | 0.9725 |
| <b><i>CKM</i></b>                     | 1.0000   | 1.0000 | 1.0000 | 1.0000 |
