# Supplementary material
Source: PubMed Central journal article supplement (PMC4136512)

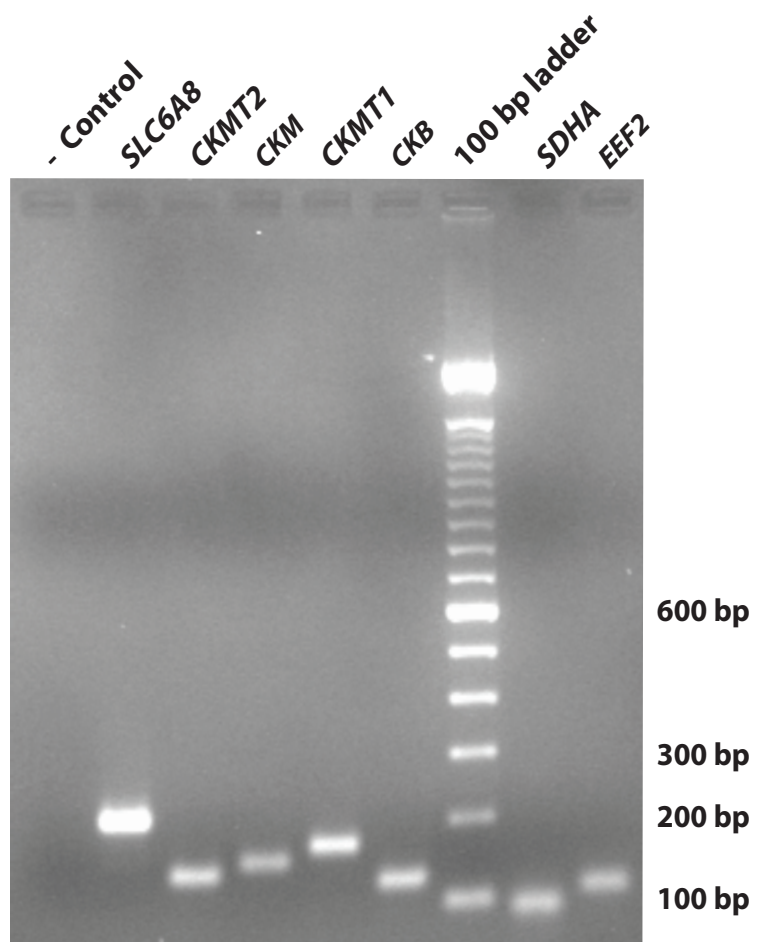

Supplemental Figure 2

Supplement: NIHMS502990-supplement-02.pdf [file NIHMS502990-supplement-02.pdf]
